# Supplementary material
Source: PubMed Central journal article supplement (PMC6501827)
Supplement: NIHMS1526609-supplement-Supplemental_Digital_Content_1.pdf [file NIHMS1526609-supplement-Supplemental_Digital_Content_1.pdf]

**Appendix 1. Pregnancy simulation diagram.**

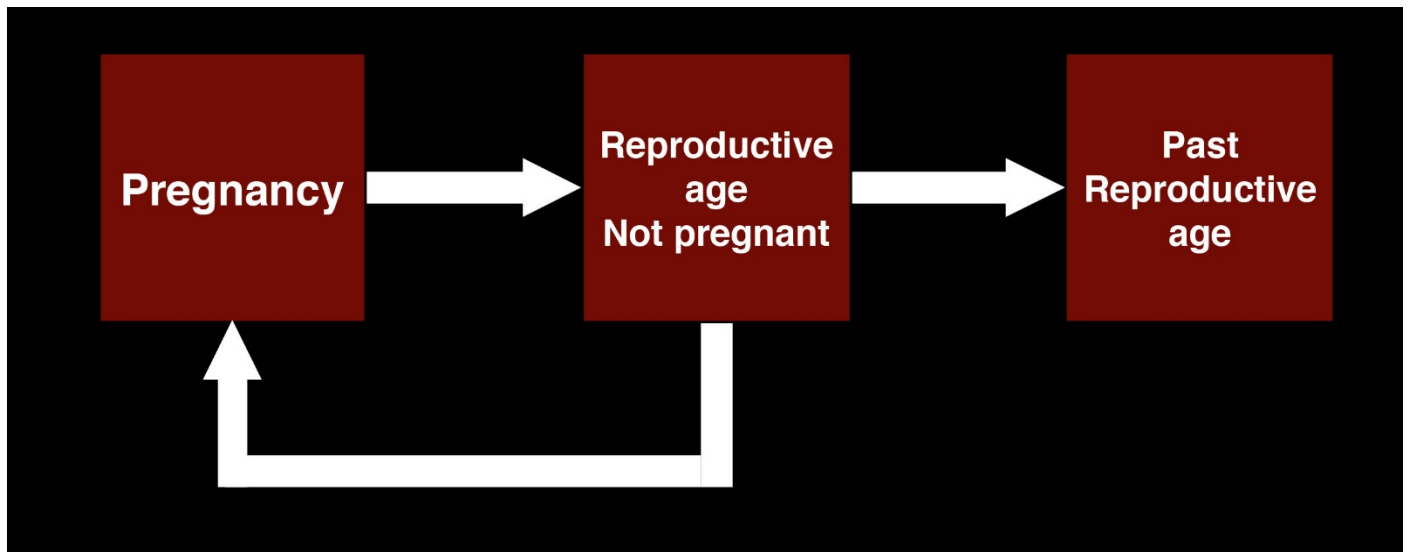

Tasillo A, Yazdi GE, Nolen S, Schillie S, Vellozzi C, Epstein R, et al. Short-term effects and long-term cost-effectiveness of universal hepatitis c testing in prenatal care. *Obstet Gynecol* 2019; 133.

The authors provided this information as a supplement to their article.

Appendix 2. Liver fibrosis progression and mortality diagram. HCV, hepatitis C virus.

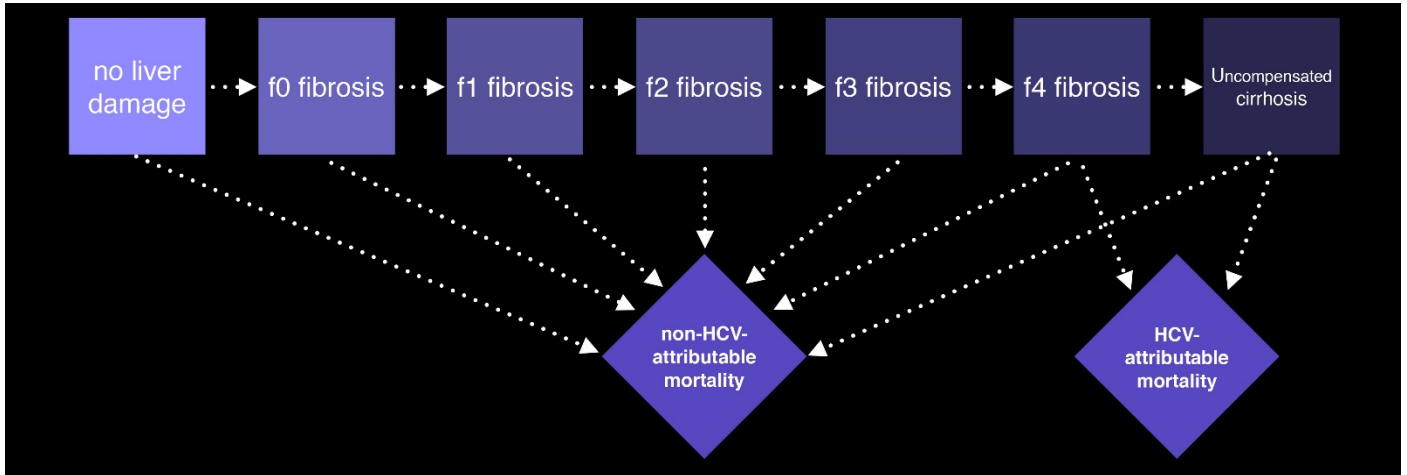

Tasillo A, Yazdi GE, Nolen S, Schillie S, Vellozzi C, Epstein R, et al. Short-term effects and long-term cost-effectiveness of universal hepatitis c testing in prenatal care. *Obstet Gynecol* 2019; 133.

The authors provided this information as a supplement to their article.

Appendix 3. Hepatitis C virus (HCV) cascade of care diagram. PWID, people who inject drugs.

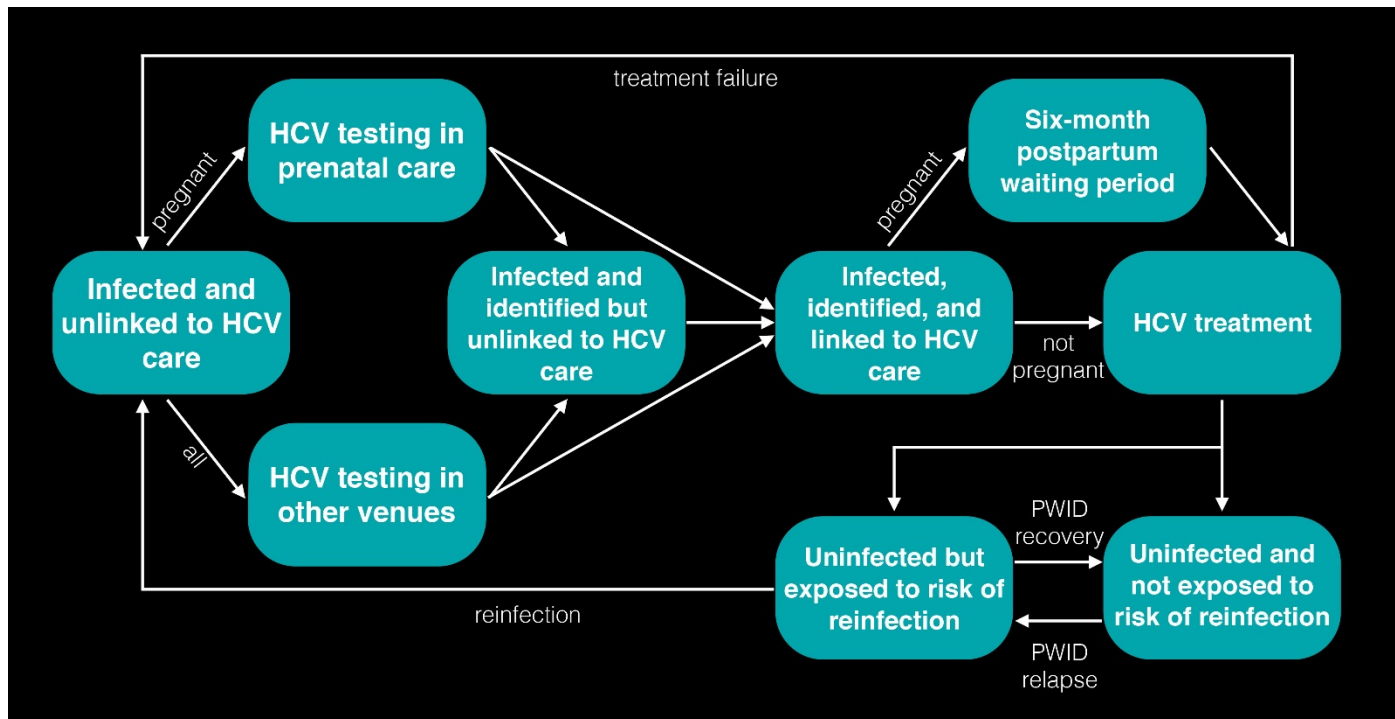

Tasillo A, Yazdi GE, Nolen S, Schillie S, Vellozzi C, Epstein R, et al. Short-term effects and long-term cost-effectiveness of universal hepatitis c testing in prenatal care. *Obstet Gynecol* 2019; 133.

The authors provided this information as a supplement to their article.
